# Estrogen Receptor $\alpha$ Functions in the Regulation of Motivation and Spatial Cognition in Young Male Rats

Katrin Meyer<sup>1,2</sup>, Volker Korz<sup>2,3\*</sup>

**1** Leibniz Institute for Neurobiology, Magdeburg, Germany, **2** Institute for Biology, Otto-von-Guericke University, Magdeburg, Germany, **3** Center for Behavioral Neuroscience, Magdeburg, Germany

## Abstract

Estrogenic functions in regulating behavioral states such as motivation, mood, anxiety, and cognition are relatively well documented in female humans and animals. In males, however, although the entire enzymatic machinery for producing estradiol and the corresponding receptors are present, estrogenic functions have been largely neglected. Therefore, and as a follow-up study to previous research, we sub-chronically applied a specific estrogen receptor  $\alpha$  (ER $\alpha$ ) antagonist in young male rats before and during a spatial learning task (holeboard). The male rats showed a dose-dependent increase in motivational, but not cognitive, behavior. The expression of hippocampal steroid receptor genes, such as glucocorticoid (GR), mineralocorticoid (MR), androgen (AR), and the estrogen receptor ER $\alpha$  but not ER $\beta$  was dose-dependently reduced. The expression of the aromatase but not the brain-derived neurotrophic factor (BDNF) encoding gene was also suppressed. Reduced gene expression and increased behavioral performance converged at an antagonist concentration of 7.4  $\mu$ M. The hippocampal and blood serum hormone levels (corticosterone, testosterone, and 17 $\beta$ -estradiol) did not differ between the experimental groups and controls. We conclude that steroid receptors (and BDNF) act in a concerted, network-like manner to affect behavior and mutual gene expression. Therefore, the isolated view on single receptor types is probably insufficient to explain steroid effects on behavior. The steroid network may keep motivation in homeostasis by supporting and constraining the behavioral expression of motivation.

**Citation:** Meyer K, Korz V (2013) Estrogen Receptor  $\alpha$  Functions in the Regulation of Motivation and Spatial Cognition in Young Male Rats. PLoS ONE 8(11): e79303. doi:10.1371/journal.pone.0079303

**Editor:** Manabu Sakakibara, Tokai University, Japan

**Received:** February 15, 2013; **Accepted:** September 22, 2013; **Published:** November 13, 2013

**Copyright:** © 2013 Meyer, Korz. This is an open-access article distributed under the terms of the Creative Commons Attribution License, which permits unrestricted use, distribution, and reproduction in any medium, provided the original author and source are credited.

**Funding:** This work was funded by the federal state of Saxony-Anhalt and the "European Regional Development Fund" (ERDF 2007–2013; Center for Behavioral Brain Studies; FKZ: 1211080005)(<http://www.med.uni-magdeburg.de/neuromd>). The funders had no role in study design, data collection and analysis, decision to publish, or preparation of the manuscript.

**Competing Interests:** The authors have declared that no competing interests exist.

\* E-mail: volker.korz@ovgu.de

## Introduction

In recent years, estrogen receptors have increasingly been identified as involved in modulating motivation and cognition in female human development, postmenopausal mood disorders, and corresponding animal models [1], [2], [3]. The effects in male subjects, however, have been largely neglected, although the entire enzymatic machinery for locally producing estrogens as well as both estrogen receptors (ER $\alpha$  and ER $\beta$ ) are present in male brains. Moreover, there is evidence that cognitive deficits can be rescued by estrogens [4]. Most studies focused on sexual and aggressive behavior [5], [6], [7]. The large body of evidence of estrogenic effects on neuronal plasticity, such as long-term potentiation, spine plasticity, and neurogenesis [8], [9], [10], [11], is contrasted by only a few studies on the effects of more general states such as motivation and mood and their outcome in behavioral performance. Aggression and modulations of the stress axis activity have been reported to be affected by estrogenic mechanisms in male mice and rats [12], [13], [14]. Aggression, therefore, may be stimulated by ER $\alpha$  and suppressed by ER $\beta$  activation in male rats [15]. Estrogenic effects in spatial learning have also been reported in both sexes [16], [17], [18], [19], [20], [21].

Hippocampal synthesis of estradiol in male rats is realized by the enzyme aromatase that converts testosterone into estradiol. Aromatase as well as synaptic and nuclear ER $\alpha$  have been

identified in all subregions of the hippocampus and in the dentate gyrus. Estradiol can induce rapid upregulation of spine number and fast modulation of hippocampal synaptic plasticity [22]. Accordingly, rapid alternation and control of various behaviors in males, including learning, are controlled by brain-derived estrogens [23].

In a previous study [24], we found a positive correlation between hippocampal ER $\alpha$  gene expression and the behavioral performance of young post-pubertal male rats in a spatial holeboard paradigm. The motivational (i.e., task readiness) component, which was extracted with principal component analysis from numerous behavioral elements, in particular was strongly correlated with the expression of ER $\alpha$  and weakly correlated with the testosterone binding AR, whereas ER $\beta$ , MR, and GR receptor gene expression was uncorrelated with components representing motivation, spatial cognition, and emotion. Therefore, in the present study, we applied the ER $\alpha$ -specific antagonist methyl-piperidino-pyrazole (MPP) in four dosages to reveal more specific functions of ER $\alpha$  activity in motivation and spatial cognition during our holeboard paradigm in male rats. Steroid receptors are assumed to act in concert and mutual interactions via heterodimerization [25] and other protein-protein interactions [26], [27]. Ligand-activated cytosolic ER $\alpha$  translocates into the nucleus where, similar to all steroid receptors, this receptor acts as a transcription factor, activating or repressing the expression of

target genes including those of other steroid receptors. Thus, we measured the expression of hippocampal corticosterone binding receptors, the MR and GR genes, as well as the AR and both estradiol binding estrogen receptors. In addition to these slow genomic functions, membrane-bound steroid receptors can mediate fast non-genomic functions by activating different intracellular pathways [28]. Membrane receptors that are at least closely related to ER $\alpha$  and ER $\beta$  due to their ability to be activated by ER $\alpha$ - or ER $\beta$ -specific agonists have been identified [29]. Membrane-bound estrogen receptors are also involved in hippocampal-dependent object memory consolidation [30].

Therefore, while the MPP binds to cytosolic ER, we cannot rule out that membrane-bound receptors are blocked as well. The blood serum and hippocampal stress and sex hormone concentrations were also measured. In addition, aromatase and BDNF gene expression was measured. The latter was considered because rat hippocampal BDNF has been reported to interact with estrogens such that the administration of estradiol enhances hippocampal BDNF-mRNA [31], [32], by activation of extracellular ER [33], whereas corticosterone [34] reduces BDNF-mRNA, and thus have opposite effects on BDNF expression and possibly on BDNF effects on learning and memory.

Based on our previous data, we hypothesized reducing the motivation of males treated with an ER $\alpha$  antagonist, whereas the spatial cognitive aspect should be unaffected. The latter hypothesis was confirmed, whereas MPP treatment resulted in increased motivation. Possible reasons for these results are discussed, and advanced hypotheses are outlined.

## Methods

### Ethics Statement

All experiments were performed in accordance with the European Communities Council Directive of 24th Nov. 1986 (86/609/EEC) and the German guidelines for the care and use of animals in laboratory research. The experimental protocols were approved by the ethics committee of Saxony-Anhalt. All efforts were made to reduce the number of rats used in this study and their suffering.

### Animal Keeping

Wistar rats from the institute's breeding colony were weaned at post-natal day 21 and then housed in groups of 5 males in standard cages (59 cm $\times$ 38 cm $\times$ 25 cm). They were maintained under a 12 h: 12 h light regimen with lights on at 6:00 a.m.; the ground was covered with commercial bedding material (wood spans, ssniff, Soest, Germany) and food pellets (ssniff, M-H), and tap water was given *ad libitum*. After the implantation of a cannula when the rats were 7 weeks old, they were transferred to individual cages (40 cm $\times$ 25 cm $\times$ 18 cm).

### Surgery

Seven-week-old rats were anesthetized with Nembutal (40 mg/kg, intraperitoneal.). An intra-cerebroventricular (i.c.v.) cannula was stereotactically implanted in the lateral ventricle of the right hemisphere (coordinates: AP  $-0.8$ ; L  $1.5$  from the bregma). The animals were allowed to recover from surgery for at least 3 days. After recovery, the animals were mildly food deprived for 4 days (receiving 5–6 g food per day, thus reaching about 80% of the initial body weight); food deprivation persisted during the training procedure. Body weights between groups were not statistically different at all time points: day  $-3$  (three days before habituation;  $F_{5,80} = 1.44$ ,  $p = 0.219$ ), day 0 (habituation;  $F_{5,80} = 1.27$ ,

$p = 0.287$ ), day 1 (first training day;  $F_{5,80} = 1.87$ ,  $p = 0.109$ ), and day 2 (second training day;  $F_{5,80} = 1.52$ ,  $p = 0.194$ ).

### Behavioral Tests

**Holeboard.** The holeboard apparatus consisted of a black board (1 m $\times$ 1 m) with 16 regularly arranged holes, 7.5 cm in diameter and 7 cm deep. The board was surrounded with Plexiglas walls 50 cm high. The walls were covered with white paper on the outside and marked with a different black cue at each side. Four out of 16 holes were baited in a fixed pattern with standard food pellets (dustless precision pellets, 45 mg, BioServ).

Path trajectories were recorded with the tracking system BiObserve Viewer software (Version 3.0.0.92), and behavioral parameters were measured. The head-dips of the animals were registered by photobeams at the middle of each hole. The photobeam signals were detected and counted by the holeboard-plugin of the BiObserve Viewer software.

Thus, the time to find all pellets (the latency for rats that did not find all four pellets was scored as 120 s), the average velocity (given as the average speed in cm/s during a given trial), the number of pellets found, the hole dips/s, the total hole dips, the mean distance to the wall (the distance from the animal's body to the nearest wall, given as the mean over all time points of a trial), the working memory errors (a rat revisits a hole that it already took bait from during a specific trial), and the reference memory errors (visiting an unbaited hole) were recorded. We calculated an index of performance for both types of memory. This calculation helps to divide the animals that made no errors, because they did not move at all on the holeboard from those that made no errors because they performed the task correctly. The index was calculated as total visits/(error+total visits). Thus, an index of 0 indicates no hole visit at all (0 errors because of 0 attempts were set to 0), 0.5 the number of hole visits equals the number of errors, and 1 indicates no error (four dips coincides with four pellets found).

Animals stayed in their home cages in the testing room during the entire experiment. Animals were transferred from the cage to the test arena for each training trial. A trial was automatically stopped after 2 min or when the animal had found all 4 pellets. All experimental animals were familiarized with the test set-up 1 day before training. Then they received spatial training on a fixed pattern of baited holes over 10 trials (day 1: five trials, day 2: four trials, and the retention trial on day 3), with a 15 min inter-trial interval [35]. Training started at 9:00 am, and the retention trial (day 3) started 24 h after the last trial of day 2 (10:00 am). The board was cleaned after each trial with 20% ethanol.

**Open-field test and elevated plus maze test.** Animals were tested for 5 min in each test twice: open field at 9:00 a.m. followed by the elevated plus test 1 h later. This procedure was repeated 24 h later. Animals stayed in the test room overnight. For these tests, we used non-food-deprived animals. The arenas were cleaned after each trial with 20% ethanol.

**Open-field test.** The holeboard served also as an open-field arena, with the exception that the floor with the holes was covered with a black plastic plate. The arena was, via the tracking system, divided into different zones: four corner zones (25 cm $\times$ 25 cm), four wall zones (25 cm $\times$ 50 cm), and one center zone (50 cm $\times$ 50 cm). The percentage of time spent in each zone, the mean velocity, and the track length were measured.

**Elevated plus maze.** The elevated plus maze consisted of two closed and two open arms of black plastic at a height of 80 cm above floor. The arms were 10 cm wide and 50 cm long. The closed arms were equipped with black walls (30 cm high). From a center arena (10 cm $\times$ 10 cm), the animals started to explore the maze. The percentage of time spent in each arm, the mean

velocity, and the track length were measured via the BiObserve Viewer software.

## Pharmacology

The ER $\alpha$  antagonist MPP binds to extranuclear receptors with very high specificity [36] and has been proved to antagonize estradiol-induced gene transactivation and -repression with no effect on these processes mediated through ER $\beta$  [37]. MPP, dissolved in water, was administered in four concentrations, 1.5  $\mu$ mol (n = 18), 3.7  $\mu$ mol (n = 13), 7.4  $\mu$ mol (n = 18), and 12.6  $\mu$ mol (n = 12), and applied over 7 consecutive days (starting 5 days before the experiments and ending at training day 2) via a Hamilton syringe (5  $\mu$ l volume over 5 min). A flexible tube allowed the animals to move freely during administration. Two food-deprived, vehicle-treated groups, one trained (n = 13) and one untrained (n = 7), served as time-matched controls. The untrained control group remained in the testing room throughout the experiments. All animals in the various groups were killed euthanized at the same time point (15 min after the retention trial, i.e., between 10:15 and 10:30 a.m.).

Similar as in previous studies, we investigated the right hippocampus (genes, hormones) as well as the hormone levels in blood serum.

The rats used for the open-field and elevated plus maze tests were treated with 7.4  $\mu$ mol MPP i.c.v. (the most effective dose in the holeboard task) or vehicle. In accordance with the holeboard procedure, daily injections started 5 days before the first test day and continued during the two test days.

## Tissue Sampling and Hormone Assaying

Animals were decapitated 15 min after the last trial, and trunk blood was collected in vials containing clot activator (REF 41.1500.005, Sarstedt; Germany). Tissue from the right hippocampus was rapidly dissected and frozen ( $-20^{\circ}\text{C}$ ) until measurements. Samples were homogenized (Biovortexer No. 1083; BioSpec products), diluted (Sample diluent; IBL Hamburg; REF KLZZ731) to reach a final volume of 25  $\mu$ l/mg tissue weight, and centrifuged (10 min, 10000 rpm). The supernatant was stored at  $-20^{\circ}\text{C}$ . For the hormone assays, we used the enzyme-linked immunosorbent assay (ELISA). Briefly, samples were thawed and diluted (brain samples 1:3, 1:2, and 1:1, serum samples 1:10, 1:2, and 1:5 for the testosterone, 17 $\beta$ -estradiol, and corticosterone assays, respectively). Samples and standards were applied in duplicate. OD values were measured at 450 nm in a micro-plate reader (Thermo Scientific MultiSkan FC ELISA Reader) and calculated via a standard four-parameter logistics plot. For the testosterone assay (Testosterone Saliva ELISA by IBL Hamburg; Germany), the limit of detection (LOD) was 2.0 pg/ml, and the intra-assay and inter-assay coefficients of variation were 8.2% and 5.5%, respectively. The estradiol assay (17beta-Estradiol Saliva ELISA by IBL Hamburg) had an LOD of 0.4 pg/ml. The intra-assay and inter-assay coefficients of variation were a maximum of 9.9% and 11.1%, respectively. For the corticosterone kit (Corticosterone ELISA by IBL Hamburg), the LOD was 1.631 nmol/L, and the intra-assay and inter-assay coefficients of variations were 2.77% and 6.14%, respectively. Randomly chosen subsets of the animals used in the behavioral experiments were analyzed.

## Quantitative Real-time RT-polymerase Chain Reaction

Tissue from the right hippocampus, added with an mRNA stabilizing agent (RNA later, Qiagen, Hilden; Germany), was stored at  $-80^{\circ}\text{C}$ . For the analysis, mRNA was isolated (RNeasy Plus MiniKit, Qiagen) and transcribed to cDNA (high-capacity

cDNA reverse Transcription Kit from Applied Biosystems (Carlsbad, CA, USA, now Life Technologies).

Gene expression analysis was performed with a StepOnePlus machine from Applied Biosystems. TaqMan Gene Expression assays with the classification “m” were used exclusively, whose primers (Life Technologies) span an exon junction and detect only genomic DNA, except PGK, where no assay with the classification “m” was available (AR/AR: NM\_012502.1 (Rn00560747\_m1); ER $\alpha$ /ESR1: NM\_012689.1 (Rn01430443\_m1); ER $\beta$ /ESR2: NM\_012754.1 (Rn00562610\_m1); GR/NR3C1: NM\_012576.2 (Rn01405584\_m1); MR/NR3C2: NM\_037263.1 (Rn00565562\_m1); BDNF/BDNF: BC\_087634.1 (Rn01484928\_m1); Aromatase/Cyp19: NM\_017085.2 (Rn01422547\_m1); PGK/PGK: NM\_053291.3 (Rn00821429\_g1); HPRT/HPRT: NM\_012583.2 (Rn01527840\_m1); TaqMan Universal PCR Master Mix). Assays were performed in triplicate. As endogenous control, we used rat GAPDH (Vic/MGB Probe), while HPRT and PGK served as reference genes. All reagents were from Applied Biosystems. Differences in relative gene expression were calculated with the comparative cycle threshold method [38]. The relative expression levels of estrogen receptor genes ER $\alpha$  and ER $\beta$ , AR, MR, and GR as well as the BDNF and aromatase encoding genes were measured. Subsets of the animals used in the behavioral experiments were analyzed because of material limitations (serum) or were chosen randomly (brain samples).

## Statistical Analyses

All statistical analyses were conducted with SPSS (V. 20). The distribution of all data was tested with the Shapiro-Wilk-test. Differences in gene expression data and hormone concentrations were analyzed with the univariate general linear model (GLM) with the treatment as a factor followed (if significant) by post-hoc tests (Tukey). Data that were not normally distributed (reference and working memory errors) were analyzed with the Kruskal-Wallis test for k-group comparisons followed (if significant) by the Mann-Whitney-U-test for pairwise comparisons. Behavioral data over the trials were tested with a linear mixed model with trials, learning phases (days), treatment, and phase $\times$ treatment interaction as fixed factors and trials and learning phases as repeated measure variables. The linear mixed model, in contrast to the general linear model, compares the phases with different numbers of trials and handles missing values. Behavior in the open-field and elevated plus maze tests was analyzed with the GLM for repeated measures. All tests were two-tailed, and the level of significance was set at  $p \leq 0.05$ .

## Results

### Behavior

We analyzed six behavioral parameters: the latency to find all pellets, the average velocity, the number of pellets found, the average dips per second, the total number of hole dips and the mean distance of the rats to the wall (Figure 1). The outcome of the statistical analysis is summarized in Table 1. We found significant overall differences (test of fixed effects) for all parameters regarding the treatment, trial effects could be determined only in the time to find all pellets, the number of found pellets and the number of hole dips/s. A significant interaction of dose and learning phase appeared only for the time to find all pellets. The estimates of the fixed effects that animals treated with 3.7  $\mu$ mol MPP showed significantly decreased slopes at acquisition phases 1 and 2 but not during retention, whereas the decrease in the group treated with 7.4  $\mu$ mol MPP was significant in all phases. Pairwise comparisons of estimated marginal means

revealed significantly faster times to find all pellets, higher velocity, more pellets found, more total hole dips and hole dips/s and a larger wall distance for the group treated with 7.4  $\mu\text{mol}$  MPP (Video S1), faster times to find all pellets and higher velocity for the animals treated with 3.7  $\mu\text{mol}$  MPP, and larger wall distances of rats treated with 12.6  $\mu\text{mol}$  MPP compared to vehicle-treated rats (Video S2).

In addition to these behavioral parameters, we analyzed the working and reference memories. For investigating and comparing different memory states, we calculated the error indices for the end of the acquisition (trial 9) and for retention trial 10 (Figure 2). We found a significant overall difference in the reference memory ( $\chi^2 = 9.75$ ,  $df = 4$ ,  $p = 0.045$ ) but not working memory ( $\chi^2 = 1.19$ ,  $df = 4$ ,  $p = 0.880$ ) indices in trial 9. However, single group comparisons revealed no significant differences in reference

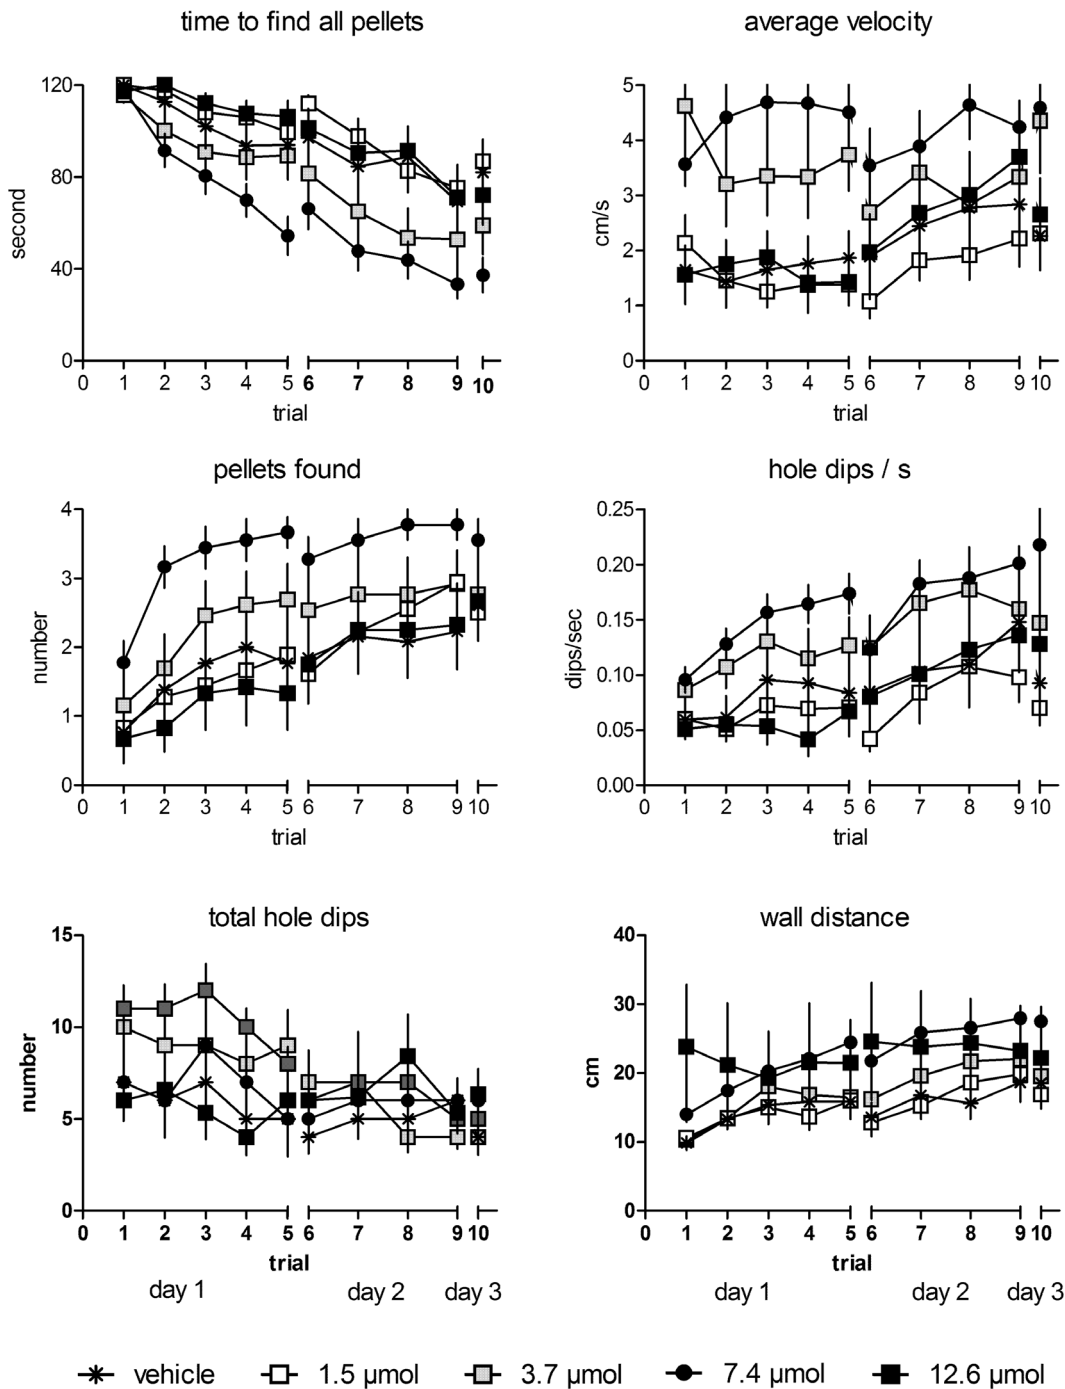

**Figure 1. Treatment with MPP at a 3.7 and 7.4  $\mu\text{mol}$  concentration decreased the time to find all pellets and increased the average velocity when compared to vehicle controls.** Only animals treated with 7.4  $\mu\text{mol}$  MPP found significantly more pellets within 2 min, showed increased numbers of hole dips/s and total hole dips as compared to vehicle treated rats and larger mean wall distances were shown in rats treated with 7.4 and 12.6  $\mu\text{mol}$  MPP when compared to controls. Given are the arithmetic means and the s.e.m. doi:10.1371/journal.pone.0079303.g001

**Table 1.** Statistical analysis of differences in behavior.

| behavior                 | tests of fixed effects (type III) |           |       |                    | estimates of fixed effects |         |              |              | pairwise comparisons |         |                  |
|--------------------------|-----------------------------------|-----------|-------|--------------------|----------------------------|---------|--------------|--------------|----------------------|---------|------------------|
|                          | effect                            | df        | F     | p                  | effect                     | df      | T            | p            | pair                 | df      | p                |
| time to find all pellets | trial                             | 7/124.007 | 21.99 | <b>&lt;0.000</b>   | acquisition1×3.7 μmol      | 83.838  | -2.134       | <b>0.036</b> | 1.5 μmol/vehicle     | 103.88  | 1.000            |
|                          | dose                              | 4/103.880 | 14.29 | <b>&lt;0.000</b>   | acquisition2×3.7 μmol      | 277.495 | -2.895       | <b>0.004</b> | 3.7 μmol/vehicle     | 103.88  | <b>0.024</b>     |
|                          | phase×dose                        | 8/127.358 | 6.75  | <b>&lt;0.000</b>   | acquisition1×7.4 μmol      | 83.838  | -2.422       | <b>0.018</b> | 7.4 μmol/vehicle     | 103.88  | <b>&lt;0.000</b> |
|                          |                                   |           |       |                    | acquisition2×7.4 μmol      | 277.495 | -5.399       | <b>0.000</b> | 12.6 μmol/vehicle    | 103.88  | 1.000            |
|                          |                                   |           |       | retention×7.4 μmol | 69                         | -3.038  | <b>0.003</b> |              |                      |         |                  |
| average velocity         | trial                             | 7/147.923 | 1.15  | 0.338              |                            |         |              |              | 1.5 μmol/vehicle     | 124.906 | 1.000            |
|                          | dose                              | 4/124.579 | 18.58 | <b>&lt;0.000</b>   |                            |         |              |              | 3.7 μmol/vehicle     | 124.906 | <b>0.001</b>     |
|                          | phase×dose                        | 8/142.628 | 1.62  | 0.123              |                            |         |              |              | 7.4 μmol/vehicle     | 124.906 | <b>&lt;0.000</b> |
|                          |                                   |           |       |                    |                            |         |              |              | 12.6 μmol/vehicle    | 124.906 | 1.000            |
| pellets found            | trial                             | 7/137.952 | 7.37  | <b>&lt;0.000</b>   |                            |         |              |              | 1.5 μmol/vehicle     | 132.579 | 1.000            |
|                          | dose                              | 4/132.579 | 12.96 | <b>&lt;0.000</b>   |                            |         |              |              | 3.7 μmol/vehicle     | 132.579 | 0.331            |
|                          | phase×dose                        | 8/145.105 | 0.54  | 0.825              |                            |         |              |              | 7.4 μmol/vehicle     | 132.579 | <b>&lt;0.000</b> |
|                          |                                   |           |       |                    |                            |         |              |              | 12.6 μmol/vehicle    | 132.579 | 1.000            |
| hole dips/s              | trial                             | 7/126.841 | 4.94  | <b>&lt;0.000</b>   |                            |         |              |              | 1.5 μmol/vehicle     | 88.989  | 1.000            |
|                          | dose                              | 4/88.989  | 13.68 | <b>&lt;0.000</b>   |                            |         |              |              | 3.7 μmol/vehicle     | 88.989  | 0.073            |
|                          | phase×dose                        | 8/115.733 | 0.95  | 0.482              |                            |         |              |              | 7.4 μmol/vehicle     | 88.989  | <b>&lt;0.000</b> |
|                          |                                   |           |       |                    |                            |         |              |              | 12.6 μmol/vehicle    | 88.989  | 1.000            |
| total hole dips          | trial                             | 7/136.507 | 1.14  | 0.341              |                            |         |              |              | 1.5 μmol/vehicle     | 206.706 | 0.562            |
|                          | dose                              | 4/206.706 | 8.01  | <b>&lt;0.000</b>   |                            |         |              |              | 3.7 μmol/vehicle     | 206.706 | 0.915            |
|                          | phase×dose                        | 8/165.478 | 4.50  | <b>&lt;0.000</b>   |                            |         |              |              | 7.4 μmol/vehicle     | 206.706 | <b>0.005</b>     |
|                          |                                   |           |       |                    |                            |         |              |              | 12.6 μmol/vehicle    | 206.706 | 0.590            |
| wall distance            | trial                             | 7/137.488 | 2.01  | 0.058              |                            |         |              |              | 1.5 μmol/vehicle     | 199.164 | 1.000            |
|                          | dose                              | 4/199.164 | 12.98 | <b>&lt;0.000</b>   |                            |         |              |              | 3.7 μmol/vehicle     | 199.164 | 0.981            |
|                          | phase×dose                        | 8/166.839 | 1.69  | 0.103              |                            |         |              |              | 7.4 μmol/vehicle     | 199.164 | <b>&lt;0.000</b> |
|                          |                                   |           |       |                    |                            |         |              |              | 12.6 μmol/vehicle    | 199.164 | <b>&lt;0.000</b> |

Statistical analyses of differences in behavior. Linear mixed model with trial, learning phase (phase: acquisition1, acquisition2, retention), the MPP-dose and the learning phase×dose as factors and behavior as dependent variable. Trial, MPP-dose and learning phase×dose interaction as fixed effects. Trial and phase as repeated measures variables with diagonal covariance type. Estimates of fixed effects are given only for the interactions (controls as reference category) and only significant results. Main effects of estimated marginal means. Significant results are indicated in bold (p-values of pairwise comparisons of estimated marginal means are Bonferroni-corrected). doi:10.1371/journal.pone.0079303.t001

memory indices between any groups (p>0.1, each). In trial 10, no significant differences in the reference memory (chi<sup>2</sup> = 8.38, df = 4, p = 0.079) or working memory (chi<sup>2</sup> = 7.85, df = 4, p = 0.097) indices were identified.

**Hormones**

We found significant differences in the hippocampal corticosterone (F<sub>5,48</sub> = 3.268, p = 0.014) levels, but not in the serum concentrations (F<sub>5,43</sub> = 1.125, p = 0.364). The statistical analyses of the testosterone and estradiol concentrations (Figure 3) revealed no differences in the hippocampal (F<sub>5,47</sub> = 1.343, p = 0.265, and F<sub>5,47</sub> = 1.665, p = 0.164, respectively) and serum samples (F<sub>5,45</sub> = 1.017, p = 0.420, and F<sub>5,38</sub> = 1.193, p = 0.334, respectively).

The post hoc tests revealed higher hippocampal corticosterone concentrations in the animals treated with 3.7 μmol MPP compared to the rats treated with 1.5 μmol (p = 0.044) and 12.6 μmol (p = 0.026) MPP.

**Genes**

The gene expression data are given in Figure 4. The GLM provides significant differences for all genes (ERα: F<sub>5,54</sub> = 6.509, p<0.001; ERβ: F<sub>5,54</sub> = 2.852, p = 0.024; AR: F<sub>5,54</sub> = 7.567, p<0.001; MR: F<sub>5,54</sub> = 28.802, p<0.001; GR: F<sub>5,54</sub> = 11.714, p<0.001; BDNF: F<sub>5,54</sub> = 11.805, p<0.001) except the aromatase gene *Cyp19* (F<sub>5,54</sub> = 1.642, p = 1.670).

The single group comparisons revealed that animals treated with 7.4 μmol MPP showed the highest suppression of relative gene expression of ERα compared with animals treated with 1.5 μmol (p = 0.008), 3.7 μmol (p = 0.017), and vehicle (p = 0.004) and untrained vehicle-treated control rats (p = 0.002). Furthermore, animals administered 12.6 μmol MPP had a significantly lower ERα-mRNA level than the vehicle-treated trained (p = 0.036) and untrained (p = 0.014) controls. The relative gene expression of ERβ, however, differed significantly only in the 7.4 μmol MPP-treated rats compared to the untrained vehicle-treated rats (p = 0.043).

The expression pattern of the androgen receptor was similar to that of ERα (7.4 μmol/1.5 μmol: p = 0.011; 7.4 μmol/3.7 μmol:

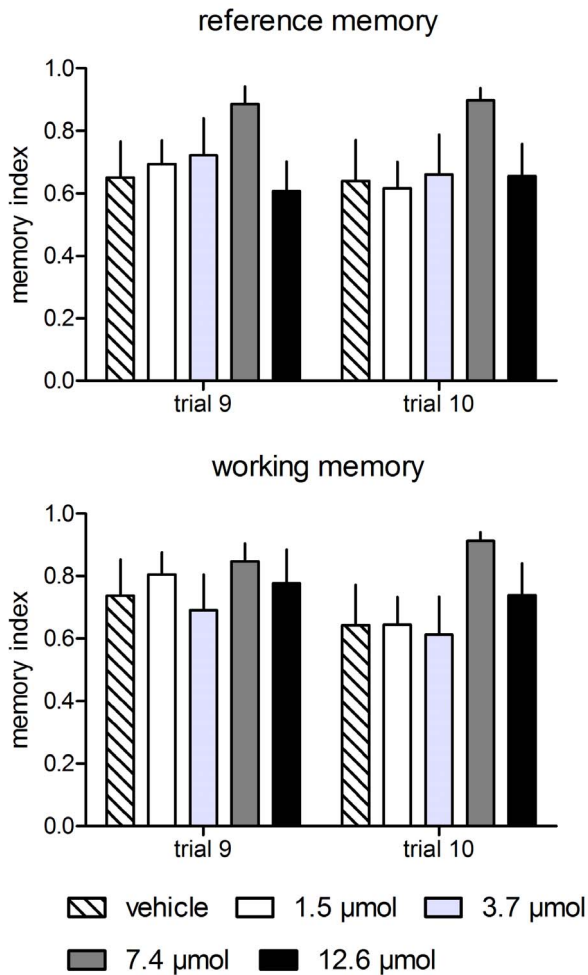

**Figure 2. Treatment with MPP at any concentration had no statistically significant effect on the reference and working memory indices at the end of the second acquisition phase (trial 9) and during retention (trial 10).** However, animals treated with 7.4 μmol MPP showed the highest indices of both types of memory. Given are the arithmetic means and the s.e.m. doi:10.1371/journal.pone.0079303.g002

$p = 0.042$ ; 7.4 μmol/vehicle:  $p < 0.001$ ; 7.4 μmol/untrained vehicle:  $p = 0.013$ ; 12.6 μmol/vehicle:  $p = 0.001$ ; 12.6 μmol/untrained vehicle:  $p = 0.015$ ). In addition, the 12.6 μmol MPP group showed a difference in AR expression compared with the 1.5 μmol MPP-treated animals ( $p = 0.017$ ).

The mineralocorticoid receptor also had the lowest gene expression in animals treated with 7.4 μmol MPP compared to all other groups (7.4 μmol/1.5 μmol:  $p < 0.001$ ; 7.4 μmol/3.7 μmol:  $p < 0.001$ ; 7.4 μmol/12.6 μmol:  $p < 0.001$ ; 7.4 μmol/vehicle:  $p < 0.001$ ; 7.4 μmol/untrained vehicle:  $p < 0.001$ ). Moreover, the 3.7 μmol MPP group differed significantly from the 1.5 μmol MPP group ( $p = 0.030$ ), as well as from the vehicle-treated trained ( $p = 0.005$ ) and untrained ( $p = 0.028$ ) control groups.

For the BDNF and glucocorticoid receptor, we observed decreased gene expression in animals treated with 7.4 μmol compared to the 1.5 μmol (both:  $p < 0.001$ ), 3.7 μmol (BDNF:  $p < 0.001$ ; GR:  $p = 0.005$ ), 12.6 μmol (both:  $p < 0.001$ ), and vehicle-treated trained (both:  $p < 0.001$ ) and untrained (both:  $p < 0.001$ ) groups.

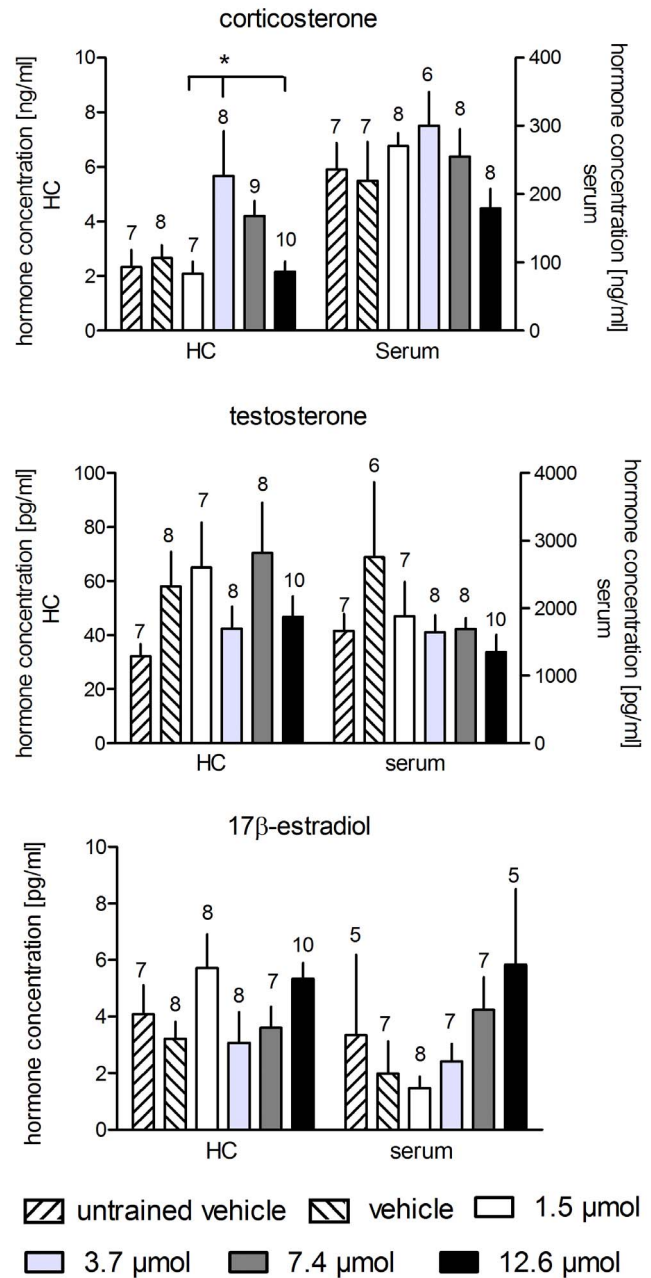

**Figure 3. Treatment with MPP at any concentration had a statistically significant effect on the hippocampal concentrations of corticosterone only between the group treated with 3.7 μmol compared to the groups treated with 1.5 μmol and 7.4 μmol MPP.** Serum concentrations were not different, and no difference between groups was found for testosterone and 17β-estradiol. Horizontal lines with asterisks indicate statistically significant differences. Numbers above columns indicate sample sizes. Longer vertical lines indicate the groups against which the other groups were tested. Given are the arithmetic means and the s.e.m. doi:10.1371/journal.pone.0079303.g003

### Dose Effects

To compare dose effects on behavior and gene expression, we calculated a dose-effect curve (Figure 5) at the individual level. We followed the trend indicated by the between-group statistical effects and calculated the curve as the percentage of treated individuals that showed measurements higher (behavior) or lower (gene expression) than the mean of the control animals. The

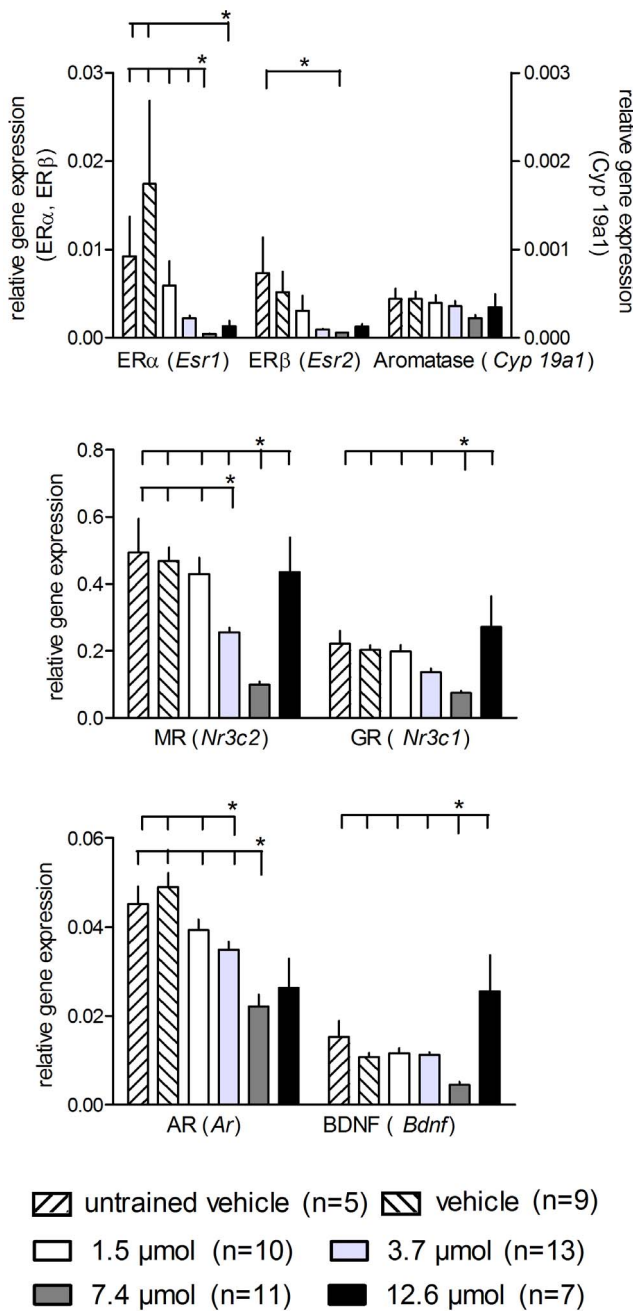

**Figure 4. Treatment with MPP had an effect on hippocampal relative gene expression of ERα, MR, GR, AR, and BDNF, but not ERβ and aromatase (*Cyp 19*) encoding genes in a dose-dependent manner with statistically significant lower expression of only the group treated with 7.4 μmol MPP compared to the trained vehicle-treated animals.** Horizontal lines with asterisks indicate statistically significant differences. Numbers in brackets indicate sample sizes. Longer vertical lines indicate the groups against which the other groups were tested. Given are the arithmetic means and the s.e.m.  
doi:10.1371/journal.pone.0079303.g004

percentage measures were plotted against the logarithm of the dosages. It became immediately apparent that all effects (except total hole dips) were highest at the 7.4 μmol dosage. Thus, only when almost all individuals showed suppression in the expression of all genes was a behavioral effect observed. In addition, ERα,

ERβ, and AR gene expression was the most sensitive to the treatment. Effects of more than 50% were observed at the lowest concentration and reached a plateau at 3.7 μmol MPP. Ninety to hundred percent of the individuals responded at 3.7 μmol MPP in MR and GR expression and maintained the effects at 7.4 μmol, whereas the aromatase and BDNF gene expression was less sensitive but also reached 100% responders at 7.4 μmol MPP. Interestingly, with the decay in responders at 12.6 μmol in behavior, the expression of MR, GR, and BDNF increased, whereas ERα, ERβ, and AR expression remained at the 100% level.

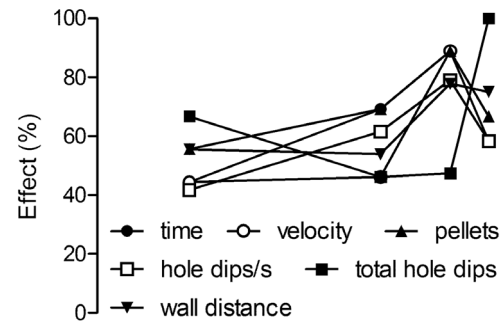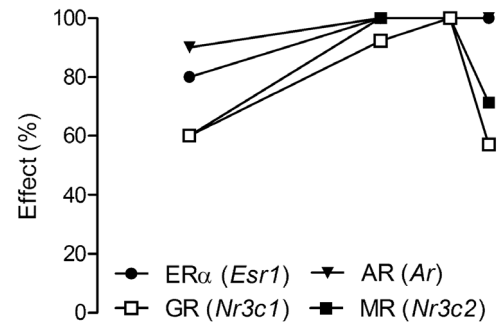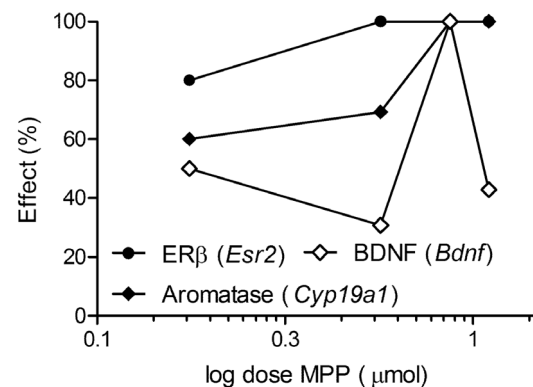

**Figure 5. Dose-response relation of behavior (upper panel; time: time to find all pellets, pellets: pellets found) and gene expression for MPP treatment.** Effect is given as the percentage of treated animals showing a measurement above (behavior, except time to find all pellets) or below (gene expression, time to find all pellets) the mean for the controls during retention. Corresponding highest effects at dose 7.4 μmol MPP.  
doi:10.1371/journal.pone.0079303.g005

## Open-field and Elevated Plus Maze Tests

To test whether the effects observed in the holeboard merely resulted from unspecific effects on locomotor activity or differences in anxiety induced by the pharmacological treatment, separate groups of animals underwent open-field and elevated plus maze tests (Figure 6). These animals were treated with 7.4  $\mu\text{mol}$  MPP (the most effective dose in the holeboard experiments,  $n = 12$ , one animal with missing values at day 1) or vehicle ( $n = 12$ ; due to technical reasons, we lost the data for one animal in the elevated plus maze test at day 2). We found no statistically significant interaction between treatment and trial and no treatment effects in the open field (time spent in the center  $F_{1,22} = 0.06$ ,  $p = 0.815$ ;  $F_{1,22} = 0.01$ ,  $p = 0.932$ ; time spent in corners  $F_{1,22} = 0.54$ ,  $p = 0.471$ ;  $F_{1,22} = 0.01$ ,  $p = 0.911$ ; time spent in wall zones  $F_{1,22} = 0.71$ ,  $p = 0.407$ ;  $F_{1,22} = 0.01$ ,  $p = 0.941$ ; velocity in the center  $F_{1,22} = 2.58$ ,  $p = 0.122$ ;  $F_{1,22} = 0.02$ ,  $p = 0.894$ ; velocity in the corners  $F_{1,22} = 1.37$ ,  $p = 0.254$ ;  $F_{1,22} = 0.39$ ,  $p = 0.54$ ; velocity in wall zones  $F_{1,22} = 0.51$ ,  $p = 0.483$ ;  $F_{1,22} = 0.261$ ,  $p = 0.615$ ; track length in the center  $F_{1,22} = 0.00$ ,  $p = 0.995$ ;  $F_{1,22} = 0.12$ ,  $p = 0.734$ ; track length in the corners  $F_{1,22} = 2.10$ ,  $p = 0.161$ ;  $F_{1,22} = 1.81$ ,  $p = 0.192$ ; track length in the wall zones  $F_{1,22} = 0.04$ ,  $p = 0.839$ ;  $F_{1,22} = 0.66$ ,  $p = 0.425$ ). Similarly, no treatment trial interaction and no treatment effect were determined in the elevated plus maze test (time spent in the center  $F_{1,20} = 0.54$ ,  $p = 0.473$ ;  $F_{1,20} = 0.00$ ,  $p = 0.956$ ; time spent in closed arms  $F_{1,20} = 0.00$ ,  $p = 0.970$ ;  $F_{1,20} = 0.05$ ,  $p = 0.82$ ; time spent in open arms  $F_{1,20} = 2.23$ ,  $p = 0.15$ ;  $F_{1,20} = 0.02$ ,  $p = 0.904$ ; velocity in the center  $F_{1,20} = 0.18$ ,  $p = 0.675$ ;  $F_{1,20} = 0.00$ ,  $p = 0.987$ ; velocity in closed arms  $F_{1,20} = 0.01$ ,  $p = 0.907$ ;  $F_{1,20} = 0.79$ ,  $p = 0.383$ ; velocity in open arms  $F_{1,20} = 0.13$ ,  $p = 0.720$ ;  $F_{1,20} = 0.78$ ,  $p = 0.387$ ; track length in the center  $F_{1,20} = 2.50$ ,  $p = 0.129$ ;  $F_{1,20} = 0.54$ ,  $p = 0.472$ ; track length in closed arms  $F_{1,20} = 1.18$ ,  $p = 0.291$ ;  $F_{1,20} = 0.61$ ,  $p = 0.443$ ; track length in open arms  $F_{1,20} = 2.22$ ,  $p = 0.152$ ;  $F_{1,20} = 0.07$ ,  $p = 0.789$ ).

## Discussion

We found dose-dependent changes (up to 7.4  $\mu\text{mol}$  MPP) in behavioral performance with most significant effects in animals treated with 7.4  $\mu\text{mol}$  MPP. These animals needed less time to find all pellets, moved faster, had more hole dips, and found more pellets than the control animals. In contrast to our hypothesis, the MPP-treated animals performed better regarding motivation (velocity, hole dips/s), whereas, in line with our hypothesis, the cognitive component of the task was not affected by the treatment. Treatment effects on the general locomotor activity and changes in anxiety, which could have contributed to the observed differences, can be ruled out by our open-field and plus maze tests. Regarding exploration and anxiety, the MPP-treated rats did not behave differently from the controls.

The effects of the MPP treatment are particularly surprising, because we found previously that the upregulation of hippocampal ER $\alpha$  gene expression is a learning-related holeboard effect in males at the age tested here. We also found, although not significant, upregulation of ER $\alpha$  gene expression in vehicle-treated males compared to untrained animals. However, the MPP-treated animals showed significantly reduced levels of gene expression not only for ER $\alpha$  but also for MR, GR, AR as well as the BDNF gene, whereas ER $\beta$  and aromatase gene expression was unaffected in the trained animals. These results support two conclusions: i. "Specific" steroid receptor functions can be revealed only against the steroid network background, characterized by a stronger relation of ER $\alpha$  activity to its own gene expression and to that of glucocorticoid and testosterone binding androgen receptors than

to ER $\beta$ , and an effect on the BDNF but not on the aromatase encoding gene. ii. The training-induced increased expression of the ER $\alpha$  encoding gene does not positively correlate with the receptor function, because the receptor blockade results in increased rather than impaired performance of motivation-indicating behavior. Activation of extranuclear ER induces hippocampal BDNF signaling, thus mediating its effects on neuroprotection and plasticity [33], [39]. Because of these known interactions, we included the BDNF gene in the present study, and interestingly, we found the MPP treatment affected BDNF gene expression. Hippocampal BDNF and the related receptors are involved in learning and memory [40], [41]; thus, an ER-BDNF interaction may partly play a role in mediating behavior in the present study.

Thus, at least parts of the observed system of steroid receptors, and there are many others [42], react in a coordinated and dose-dependent manner to the MPP treatment, which suggests that compensating mechanisms exist within the network to keep the system in homeostasis and to provide a mechanism for reacting quickly to external signals. The apparent discrepancy between the previously observed positive correlation of ER $\alpha$ -mRNA with motivational behavior and the failure to reduce motivation by ER $\alpha$  blockade on the protein level in the present study, may be explained by the translation of preexisting, training-induced, silent ER $\alpha$ -mRNA that could be quickly and locally translated into functional receptors [43], [44] by extracellular signaling. MR, that has been identified as the crucial acute stress-related receptor in our holeboard paradigm [45] may be involved in the transduction of external signals. These mechanisms could provide effects upon behavior independently from rapid changes in the availability of locally produced estrogens [23]. Future studies should prove this with *in situ*-hybridization and optical methods for identifying the hippocampal steroid receptor-mRNA distribution and trafficking in trained and untrained animals. Membrane- and cytosol-specific westernblots can detect training-induced changes in site-specific functional steroid receptors within the hippocampus. The behavioral effect that motivation increased with the ER $\alpha$ -blockade is likely a result of the MPP treatment that reduces ligand binding with functional receptors, which occupation with a natural ligand otherwise leads to a decrease in motivation. Thus, ER $\alpha$  activation does not promote motivational behavior but may constrain over-motivated, high-risk behavior preserving the animal from life-threatening situations. This may be adaptive especially in young post-pubertal rats that ontogenetically are in the phase of migrating from their social groups and exploring new environments. Importantly, we did not find upregulation of ER $\alpha$  gene expression in older individuals in the same situation [24].

The network characterization is further supported by the fact that we found significant effects in behavior only when the expression of all genes (except the aromatase and ER $\beta$  encoding genes) was affected, although there were differences in the sensitivity to MPP treatment between genes, as suggested by the dose response curve. Second, changes in hormone concentrations, due to the treatment, were absent. Therefore, compensatory modulations of receptor expression resulting from altered hormonal states cannot explain the results. Last, the effects of MPP on gene expression are dose dependent (up to 7.4  $\mu\text{mol}$  MPP), thus indicating not unspecific treatment-induced downregulation of gene expression. Further, not all genes were affected.

We noted dose-dependent effects of the MPP treatment on all behavioral elements and only an interaction of dose and learning phase effects for the times to find all pellets. Thus, the differences remained stable over the training for most of the behavioral parameters. The partial but not completely similar behavioral



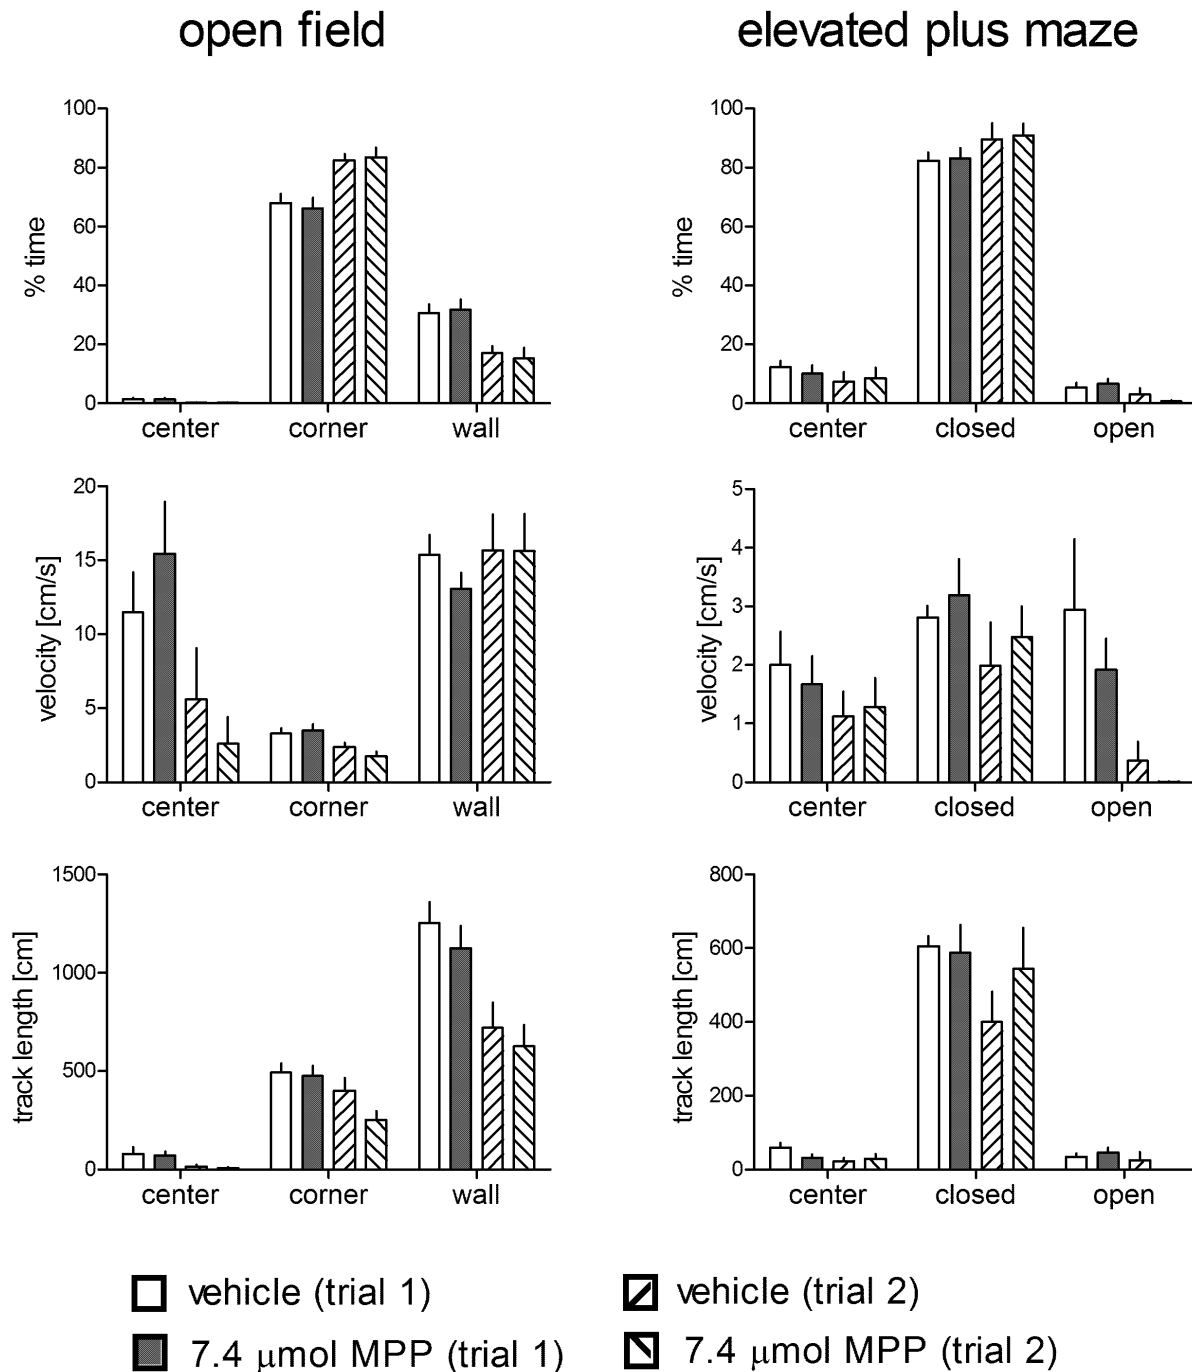

**Figure 6. Behavioral results for the open-field (left panel) and the elevated plus maze (right panel) tests of animals treated with 7.4 μmol MPP or vehicle.** Closed: closed arms; open: open arms. No group×trial interaction and no group differences were detected for any behavioral parameter. Given are the arithmetic means and the s.e.m. doi:10.1371/journal.pone.0079303.g006

results in animals treated with 3.7 and 7.4 μmol MPP (especially for the learning phase×dose interactions) along with the differences in the effects on gene expression between the two dosages suggest complex effects of structural changes in the receptor network on motivation and behavior and may indicate a structural change in the receptor network over training. Training phase-specific changes in correlations of hippocampal steroid hormone concentrations with behavior has been described for the same learning procedure [46]. In that study, hippocampal testosterone

concentrations switched from a negative correlation with reference memory errors at acquisition phase 1 to no correlation during acquisition 2 and back to a negative correlation during retention. Corticosterone concentrations in the prefrontal cortex negatively correlated with reference memory errors during acquisition and positively during retention. This may be related to brain region-specific changes in steroid functions in behavioral regulation during training or reflect network adjustments over different brain regions.

Surprisingly, the dose-dependent effects of MPP on behavioral performance disappeared when the animals were treated with a higher dose than 7.4  $\mu\text{mol}$  MPP. Animals treated with 12.6  $\mu\text{mol}$  MPP showed only a larger wall distance when compared to the vehicle-treated group. Notably, this group also showed similar MR and GR expression as the vehicle-treated animals and significantly higher expression of these receptor genes compared to the group treated with 7.4  $\mu\text{mol}$  MPP. Thus, higher concentrations of MPP may result in unspecificity of the receptor blockade with a subsequent rescue of MR and GR expression and behavior.

Due to the intra-cerebroventricular administration of MPP, resulting in brain-wide distribution, other brain regions such as the amygdala and hypothalamus, which contain estrogen receptors [47], [48], [49], are probably involved in the observed behavioral effects. Although no effects of ER $\alpha$  knockdown in the medial amygdala on sexual or aggressive behavior in 16-week-old male mice were observed, the same procedure in the ventromedial nucleus of the hypothalamus reduced both types of behavior [7]. The effects, however, may be age dependent [50], because different interactions and contributions of ER $\alpha$  and ER $\beta$  in

maintaining hippocampal-dependent memory during aging in female mice have been reported [51]. Future studies, including local drug administration, should reveal the specific contributions of these brain regions to the motivational states and behavioral performance in young rats and the possible rules underlying the experience-dependent structural changes in the steroid network.

## Supporting Information

**Video S1** Representative example of the behavioral performance of a rat treated with 7.4  $\mu\text{mol}$  MPP (trial 10). (MPG)

**Video S2** Representative example of the behavioral performance of a rat treated with vehicle (trial 10). (MPG)

## Author Contributions

Conceived and designed the experiments: VK. Performed the experiments: KM. Analyzed the data: KM VK. Wrote the paper: VK KM.

## References

1. Perlman WR, Tomaskovic-Crook E, Montague DM, Webster MJ, Rubinow DR et al. (2005) Alteration in estrogen receptor alpha mRNA levels in frontal cortex and hippocampus of patients with major mental illness. *Biol Psychiatry* 58: 812–824.
2. Hajszan T, Milner TA, Leranth C (2007) Sex steroids and the dentate gyrus. *Prog Brain Res* 163: 399–415.
3. Gillies GE, McArthur S (2010) Estrogen actions in the brain and the basis for differential action in men and women: a case for sex-specific medicines. *Pharmacol Rev* 62: 155–198.
4. Lagunas N, Calmarza-Font I, Grassi D, Garcia-Segura LM (2011) Estrogen receptor ligands counteract cognitive deficits caused by androgen deprivation in male rats. *Horm Behav* 59: 581–584.
5. McEwen BS (1988) Genomic regulation of sexual behavior. *J Steroid Biochem* 30: 179–183.
6. Paisley JC, Huddleston GG, Carruth LL, Petrusis A, Grober MS et al. (2012) Sexual responses of the male rat medial preoptic area and medial amygdala to estrogen I: site specific suppression of estrogen receptor alpha. *Horm Behav* 62: 50–57.
7. Sano K, Tsuda MC, Musatov S, Sakamoto T, Ogawa S (2013) Differential effects of site-specific knockdown of estrogen receptor  $\alpha$  in the medial amygdala, medial pre-optic area, and ventromedial nucleus of the hypothalamus on sexual and aggressive behavior of male mice. *Eur J Neurosci* doi: 10.1111/ejn.12131.
8. Fester L, Ribeiro-Gouveia V, Prange-Kiel J, von Schassen C, Böttner M et al. (2006) Proliferation and apoptosis of hippocampal granule cells require local oestrogen synthesis. *J Neurochem* 97: 1136–1144.
9. Bowers JM, Waddell J, McCarthy MM (2010) A developmental sex difference in hippocampal neurogenesis is mediated by endogenous oestradiol. *Biol Sex Differ* 1: 8.
10. González-Burgos I, Rivera-Cervantes MC, Velázquez-Zamora DA, Feria-Velasco A, Garcia-Segura LM (2012) Selective estrogen receptor modulators regulate dendritic spine plasticity in the hippocampus of male rats. *Neural Plast* 2012: 309494, doi: 10.1155/2012/309494.
11. Fester L, Prange-Kiel J, Jarry H, Rune GM (2011) Estrogen synthesis in the hippocampus. *Cell Tissue Res* 345: 285–294.
12. Kuiper GG, Lemmen JG, Carlsson B, Corton JC, Safe SH et al. (1998) Interaction of estrogenic chemicals and phytoestrogens with estrogen receptor beta. *Endocrinology* 139: 4252–4263.
13. Scordalakes EM, Rissman EF (2003) Aggression in male mice lacking functional estrogen receptor alpha. *Behav Neurosci* 117: 38–45.
14. Nomura M, Andersson S, Korach KS, Gustafsson JA, Pfaff DW et al. (2006) Estrogen receptor-beta gene disruption potentiates estrogen-inducible aggression but not sexual behavior in male mice. *Eur J Neurosci* 23: 1860–1868.
15. Tetel MJ, Pfaff DW (2010) Contributions of estrogen receptor- $\alpha$  and estrogen receptor- $\beta$  to the regulation of behavior. *Biochim Biophys Acta* 1800: 1084–1089.
16. Frye CA, Duffy CK, Walf AA (2007) Estrogens and progestins enhance spatial learning of intact and ovariectomized rats in the object placement task. *Neurobiol Learn Mem* 88: 208–216.
17. Liu F, Day M, Muniz LC, Bitran D, Arias R et al. (2008) Activation of estrogen receptor-beta regulates hippocampal synaptic plasticity and improves memory. *Nat Neurosci* 11: 334–343.
18. Rissman EF (2008) Roles of oestrogen receptors a and b in behavioral neuroendocrinology: Beyond Yin/Yang. *J Neuroendocrinol* 20: 873–879.
19. Neese SL, Korol DL, Katzenellenbogen JA, Schantz SL (2010) Impact of estrogen receptor alpha and beta agonists on delayed alternation in middle-aged rats. *Horm Behav* 58: 878–890.
20. Galea LA, Uban KA, Epp JR, Brummelte S, Barha CK et al. (2008) Endocrine regulation of cognition and neuroplasticity: our pursuit to unveil the complex interaction between hormones, the brain, and behaviour. *Can J Exp Psychol* 62: 247–260.
21. Barha CK, Galea LA (2010) Influence of different estrogens on neuroplasticity and cognition in the hippocampus. *Biochim Biophys Acta* 1800: 1056–1067.
22. Mukai H, Kimoto T, Hojo Y, Kawato S, Murakami G et al. (2010) Modulation of synaptic plasticity by brain estrogen in the hippocampus. *Biochim Biophys Acta* 1800: 1030–1044.
23. Cornil CA, Ball GF, Balthazart J (2012) Rapid control of male typical behaviors by brain-derived estrogens. *Front Neuroendocrinol* 33: 425–46.
24. Meyer K, Korz V (2013) Age dependent differences in the regulation of hippocampal steroid hormones and receptor genes: Relations to motivation and cognition in male rats. *Horm Behav* 63: 376–384.
25. Chen S, Wang J, Yu G, Liu W, Pearce D (1997) Androgen and glucocorticoid receptor heterodimer formation. A possible mechanism for mutual inhibition of transcriptional activity. *J Biol Chem* 272: 14087–14092.
26. Cvorovic A, Yuan C, Paruthiyil S, Miller OH, Yamamoto KR et al. (2011) Cross Talk between Glucocorticoid and Estrogen Receptors Occurs at a Subset of Proinflammatory Genes. *J Immunol* 186: 4354–4360.
27. Savatier J, Jalaguier S, Ferguson ML, Cavallès V, Royer CA (2010) Estrogen receptor interactions and dynamics monitored in live cells by fluorescence cross-correlation spectroscopy. *Biochemistry* 49: 772–781.
28. McEwen BS (1992) Steroid hormones: effect on brain development and function. *Horm Res* 37 Suppl 3: 1–10.
29. Wu TW, Chen S, Brinton RD (2011) Membrane estrogen receptors mediate calcium signaling and MAP kinase activation in individual hippocampal neurons. *Brain Res* 1379: 34–43.
30. Fernandez SM, Lewis MC, Pechenino AS, Harburger LL, Orr PT et al. (2008) Estradiol-induced enhancement of object memory consolidation involves hippocampal extracellular signal-regulated kinase activation and membrane-bound estrogen receptors. *J Neurosci* 28: 8660–8667.
31. Solum DT, Handa RJ (2002) Estrogen regulates the development of brain-derived neurotrophic factor mRNA and protein in the rat hippocampus. *J Neurosci* 22: 2650–2659.
32. Spencer-Segal JL, Tsuda MC, Mattei L, Waters EM, Romeo RD et al. (2012) Estradiol acts via estrogen receptors alpha and beta on pathways important for synaptic plasticity in the mouse hippocampal formation. *Neuroscience* 202: 131–146.
33. Yang LC, Zhang QG, Zhou CF, Yang F, Zhang YD et al. (2010) Extracellular estrogen receptors mediate the neuroprotective effects of estrogen in the rat hippocampus. *PLoS One* 5: e9851.
34. Schaaf MJM, Hoetelmans RWM, de Kloet ER, Vreugdenhil E (1997) Corticosterone regulates expression of BDNF and trkB but not NT-3 and trkC mRNA in the rat hippocampus. *J Neurosci Res* 48: 334–341.
35. Uzakov S, Frey JU, Korz V (2005) Reinforcement of rat hippocampal LTP by holeboard training. *Learn Mem* 12: 165–171.
36. Sun J, Huang YR, Harrington WR, Sheng S, Katzenellenbogen JA et al. (2002) Antagonists selective for estrogen receptor alpha. *Endocrinology* 143: 941–947.
37. Harrington WR, Sheng S, Barnett DH, Petz LN, Katzenellenbogen JA et al. (2003) Activities of estrogen receptor alpha- and beta-selective ligands at diverse

- estrogen responsive gene sites mediating transactivation or transrepression. *Mol Cell Endocrinol* 206: 13–22.
38. Livak KJ, Schmittgen TD (2001) Analysis of relative gene expression data using real-time quantitative PCR and the  $2^{-\Delta\Delta C_T}$  method. *Methods* 25: 403–508.
  39. Scharfman HE, MacLusky NJ (2006) Estrogen and brain-derived neurotrophic factor (BDNF) in hippocampus: Complexity of steroid hormone-growth factor interactions in the adult CNS. *Front Neuroendocrinol* 27: 415–435.
  40. Falkenberg T, Mohammed AK, Henriksson B, Persson H, Winblad B et al. (1992) Increased expression of brain-derived neurotrophic factor mRNA in rat hippocampus is associated with improved spatial memory and enriched environment. *Neurosci Lett* 138: 153–156.
  41. Ma YL, Wang HL, Wu HC, Wei CL, Lee EH (1998) Brain-derived neurotrophic factor antisense oligonucleotide impairs memory retention and inhibits long-term potentiation in rats. *Neuroscience* 82: 957–967.
  42. Ranhotra HS (2012) The estrogen-related receptors: orphans orchestrating myriad functions. *J Recept Signal Transduct Res* 32: 47–56.
  43. Richter JD, Lorenz LJ (2002) Selective translation of mRNAs at synapses. *Curr Opin Neurobiol* 12: 300–304.
  44. Bramham CR, Wells DG (2007) Dendritic mRNA: transport, translation and function. *Nature Rev Neurosci* 8: 776–789.
  45. Korz V, Frey JU (2007) Hormonal and monoamine signaling during reinforcement of hippocampal long-term potentiation and memory retrieval. *Learn Mem* 14: 160–166.
  46. Schulz K, Korz V (2010) Hippocampal testosterone relates to reference memory performance and synaptic plasticity in male rats. *Front Behav Neurosci* 4; doi: 10.3389/fnbeh.2010.00187.
  47. McEwen BS, Luine VN, Plapinger L, de Kloet ER (1975) Putative estrogen and glucocorticoid receptors in the limbic brain. *J Steroid Biochem* 6: 971–977.
  48. Takeshita H (1976) Evidence for soluble estradiol receptors in the amygdala of male and female rats. *Yonago Acta Med* 20: 125–141.
  49. McEwen BS (2002) Estrogen actions throughout the brain. *Recent Prog Horm Res* 57: 357–384.
  50. MacLusky NJ, Lieberburg I, McEwen BS (1979) The development of estrogen receptor systems in the rat brain: perinatal development. *Brain Res* 178: 129–142.
  51. Han X, Aenlle KK, Bean LA, Rani A, Semple-Rowland SL et al. (2013) Role of Estrogen Receptor  $\alpha$  and  $\beta$  in Preserving Hippocampal Function during Aging. *J Neurosci* 33: 2671–83.
